# Supplementary material for: Tunable, strongly-donating perylene photosensitizers for dye-sensitized solar cells
Source: Royal Society of Chemistry journal article supplement (doi:10.1039/c1jm10993f), 2011-01-01
Supplement: c1jm10993f.pdf [file c1jm10993f.pdf]

SUPPINFO

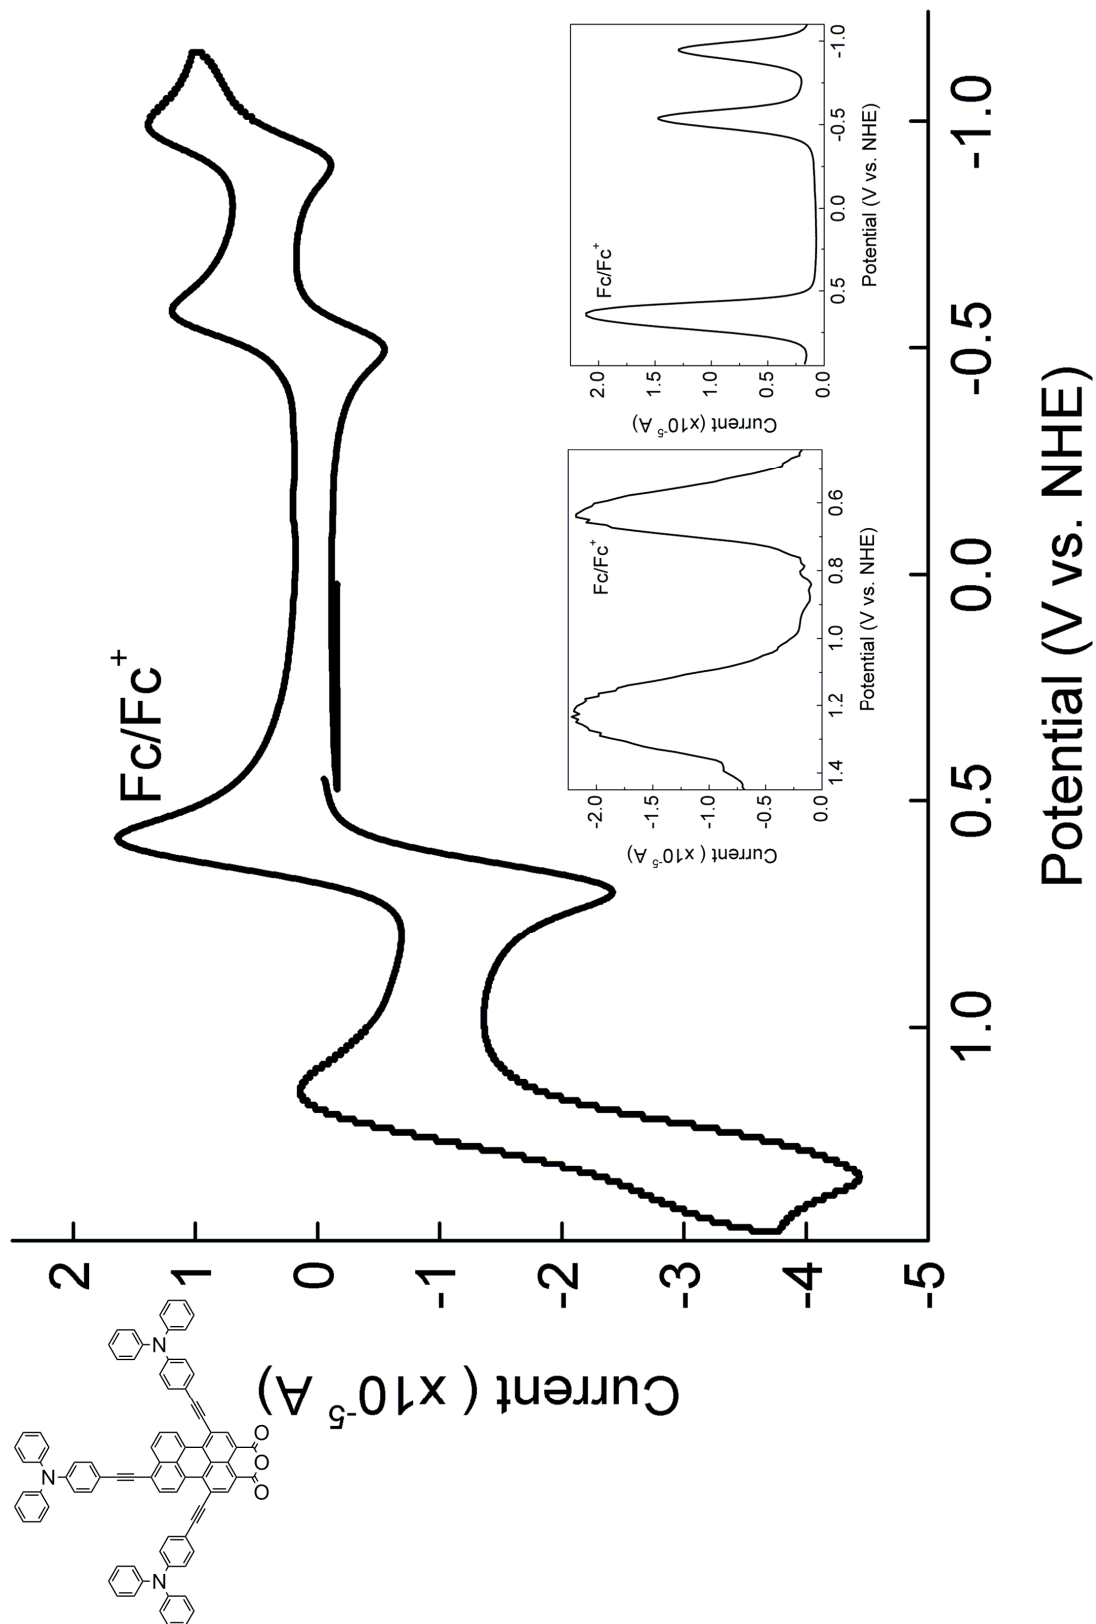

**Figure S1.** Cyclic voltammetry and differential pulse voltammetry curves of **H** in  $\text{CH}_2\text{Cl}_2$  containing 0.1M  $\text{Bu}_4\text{NPF}_6$ .

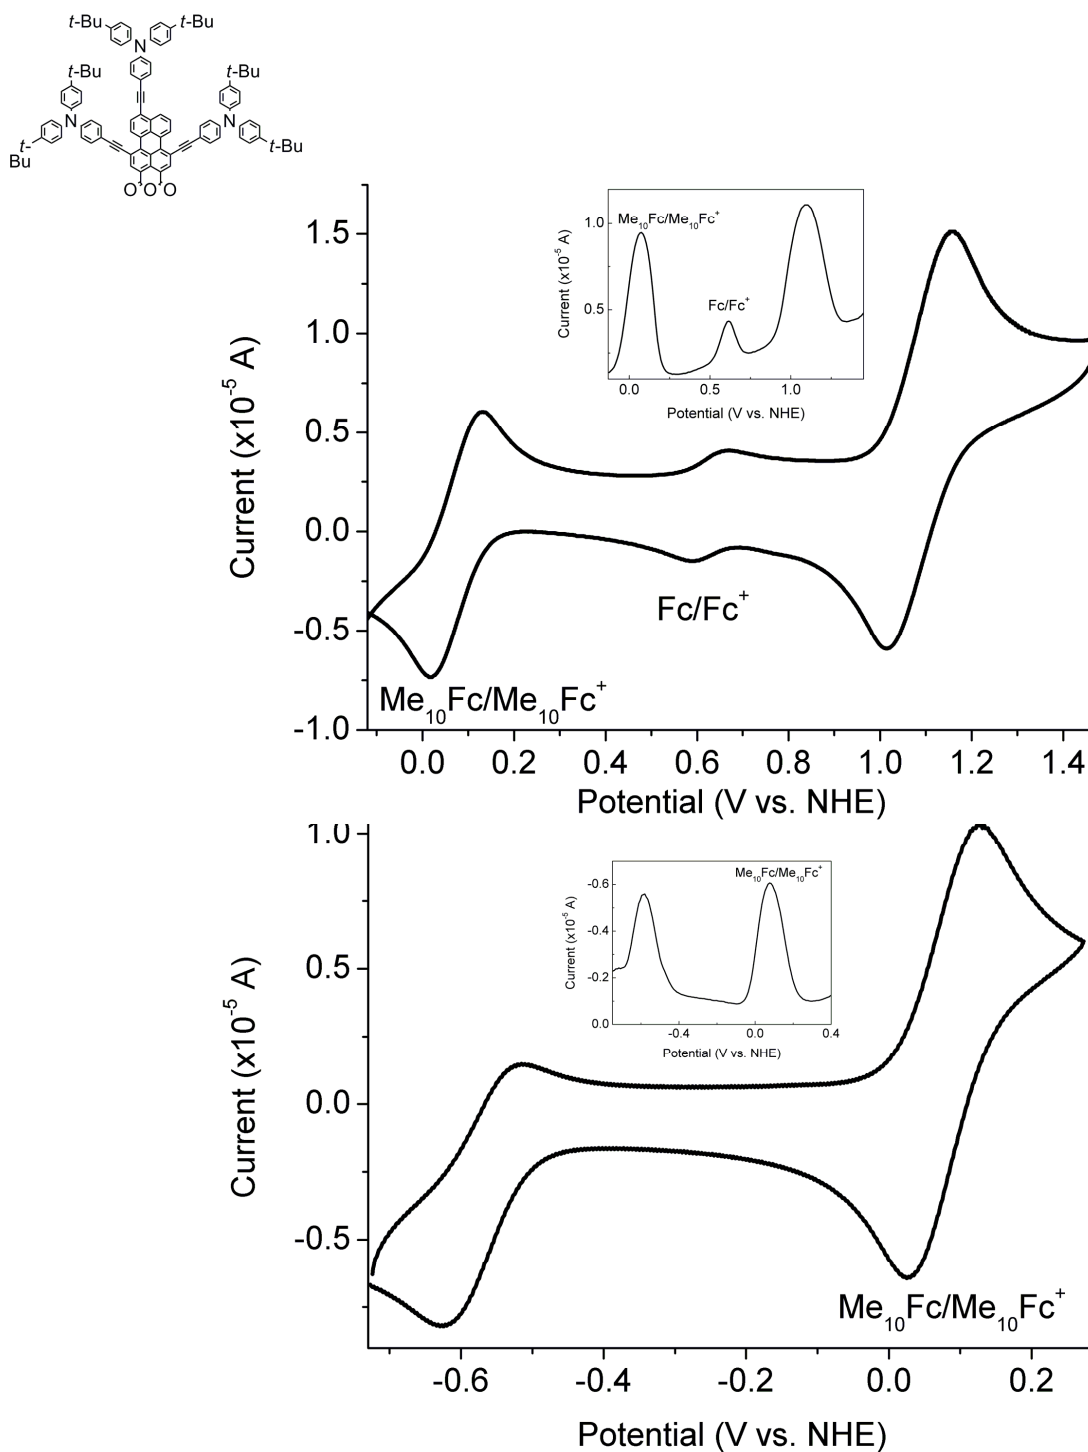

**Figure S2.** Cyclic voltammetry and differential pulse voltammetry curves of *t*-Bu in  $\text{CH}_2\text{Cl}_2$  containing 0.1M  $\text{Bu}_4\text{NPF}_6$ .

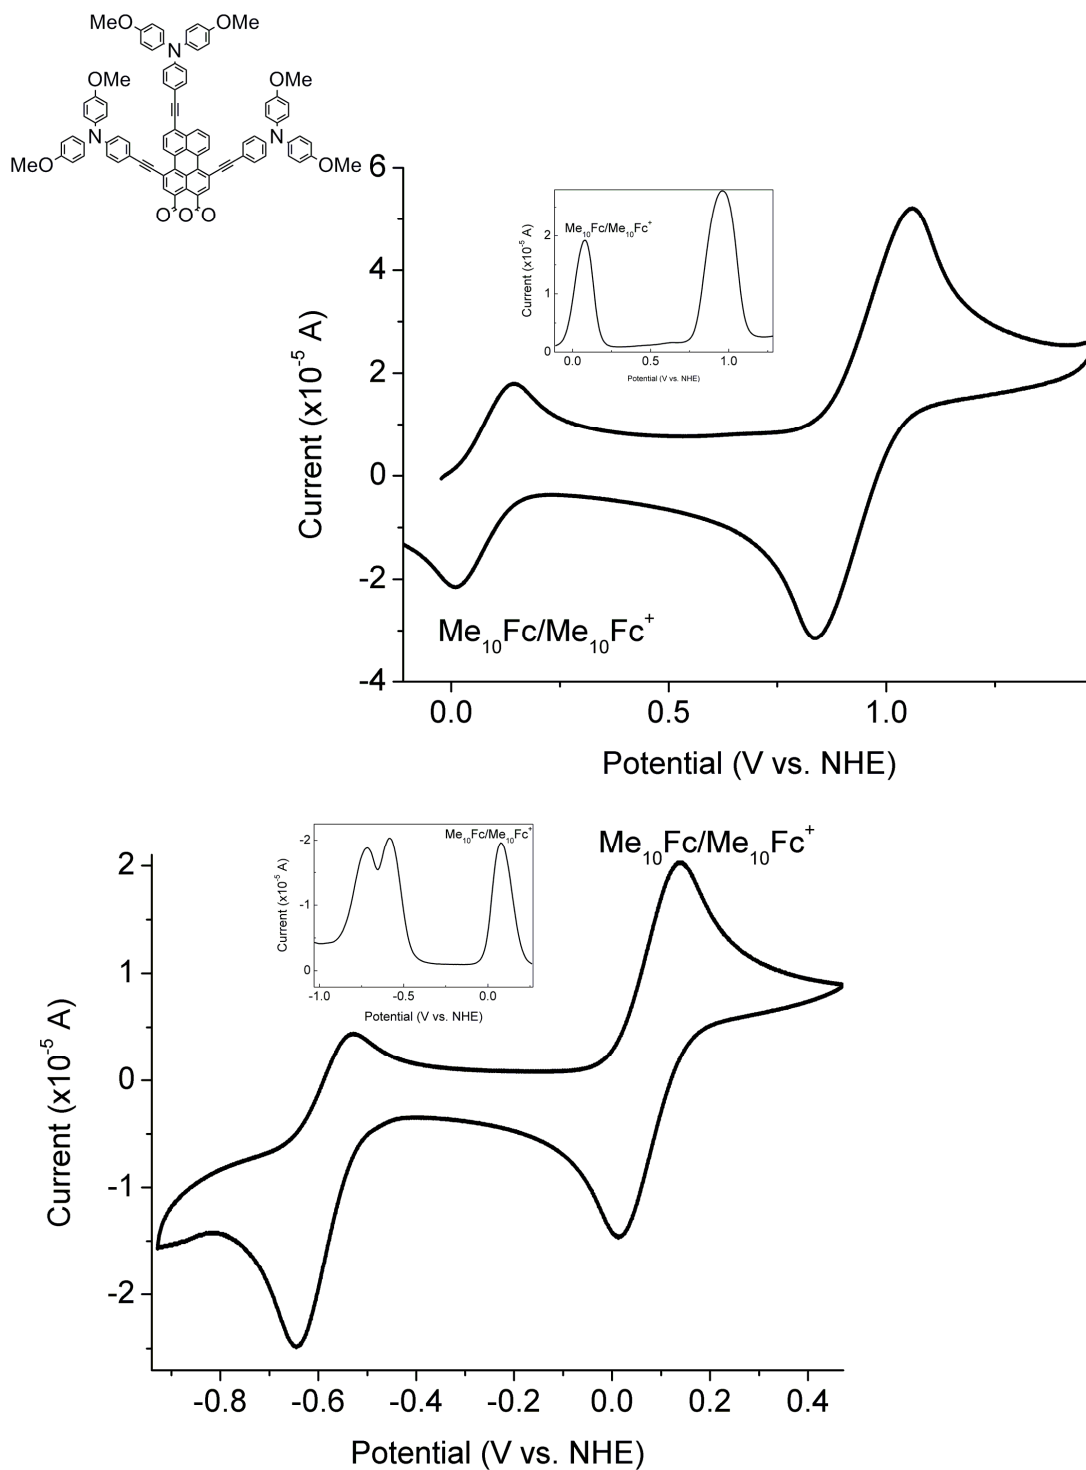

**Figure S3.** Cyclic voltammetry and differential pulse voltammetry curves of **OMe** in  $\text{CH}_2\text{Cl}_2$  containing  $0.1\text{M Bu}_4\text{NPF}_6$ .

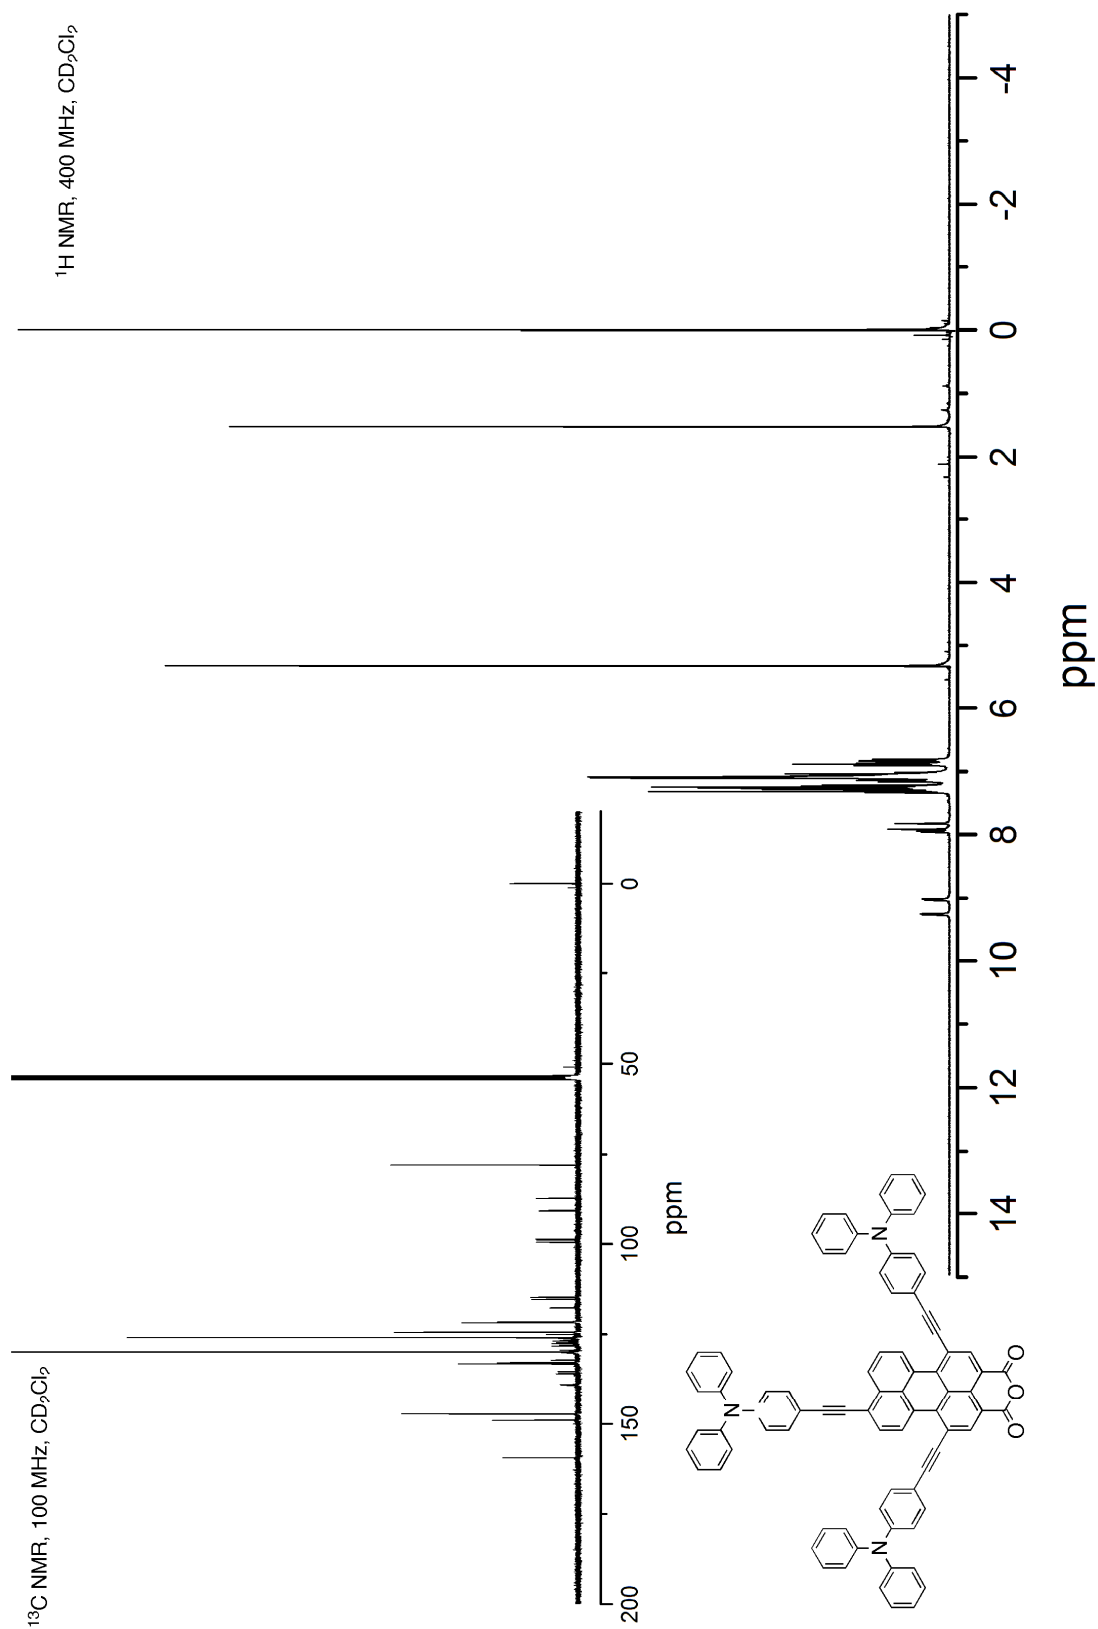

**Figure S4.**  $^1\text{H}$  and  $^{13}\text{C}$  NMR spectra of **H** in  $\text{CD}_2\text{Cl}_2$ .

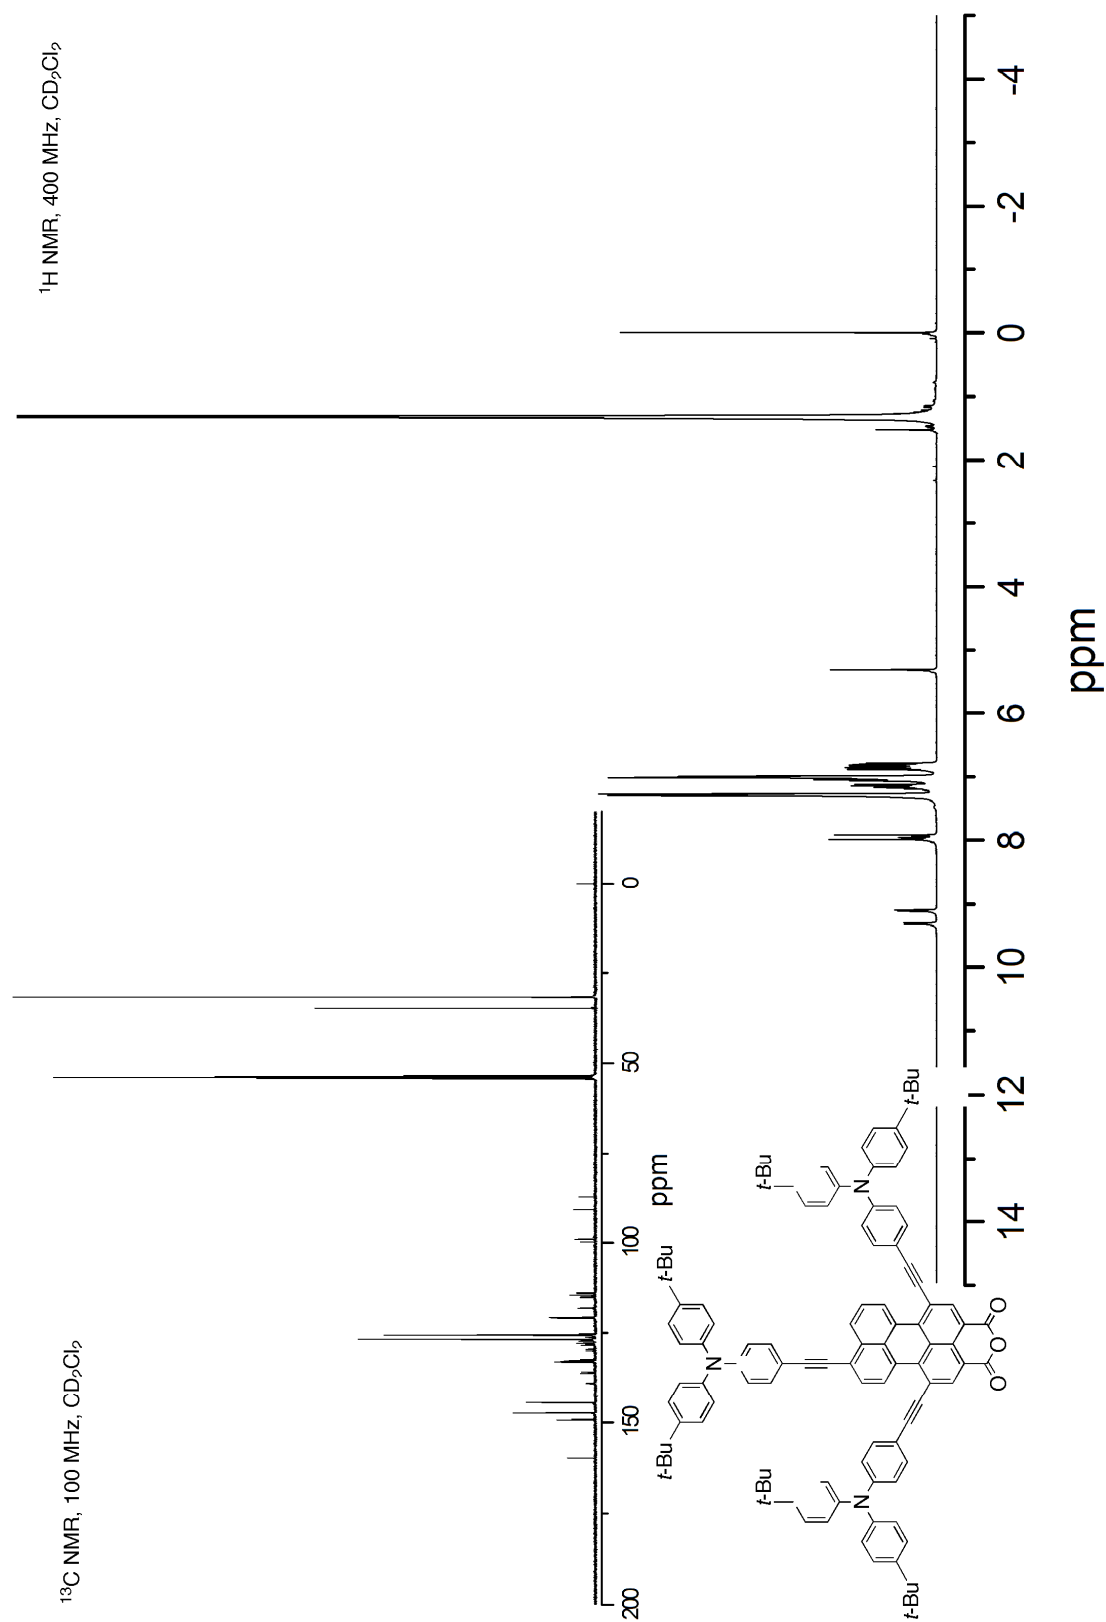

**Figure S5.H** and  $^{13}\text{C}$  NMR spectra of **t-Bu** in  $\text{CD}_2\text{Cl}_2$ .

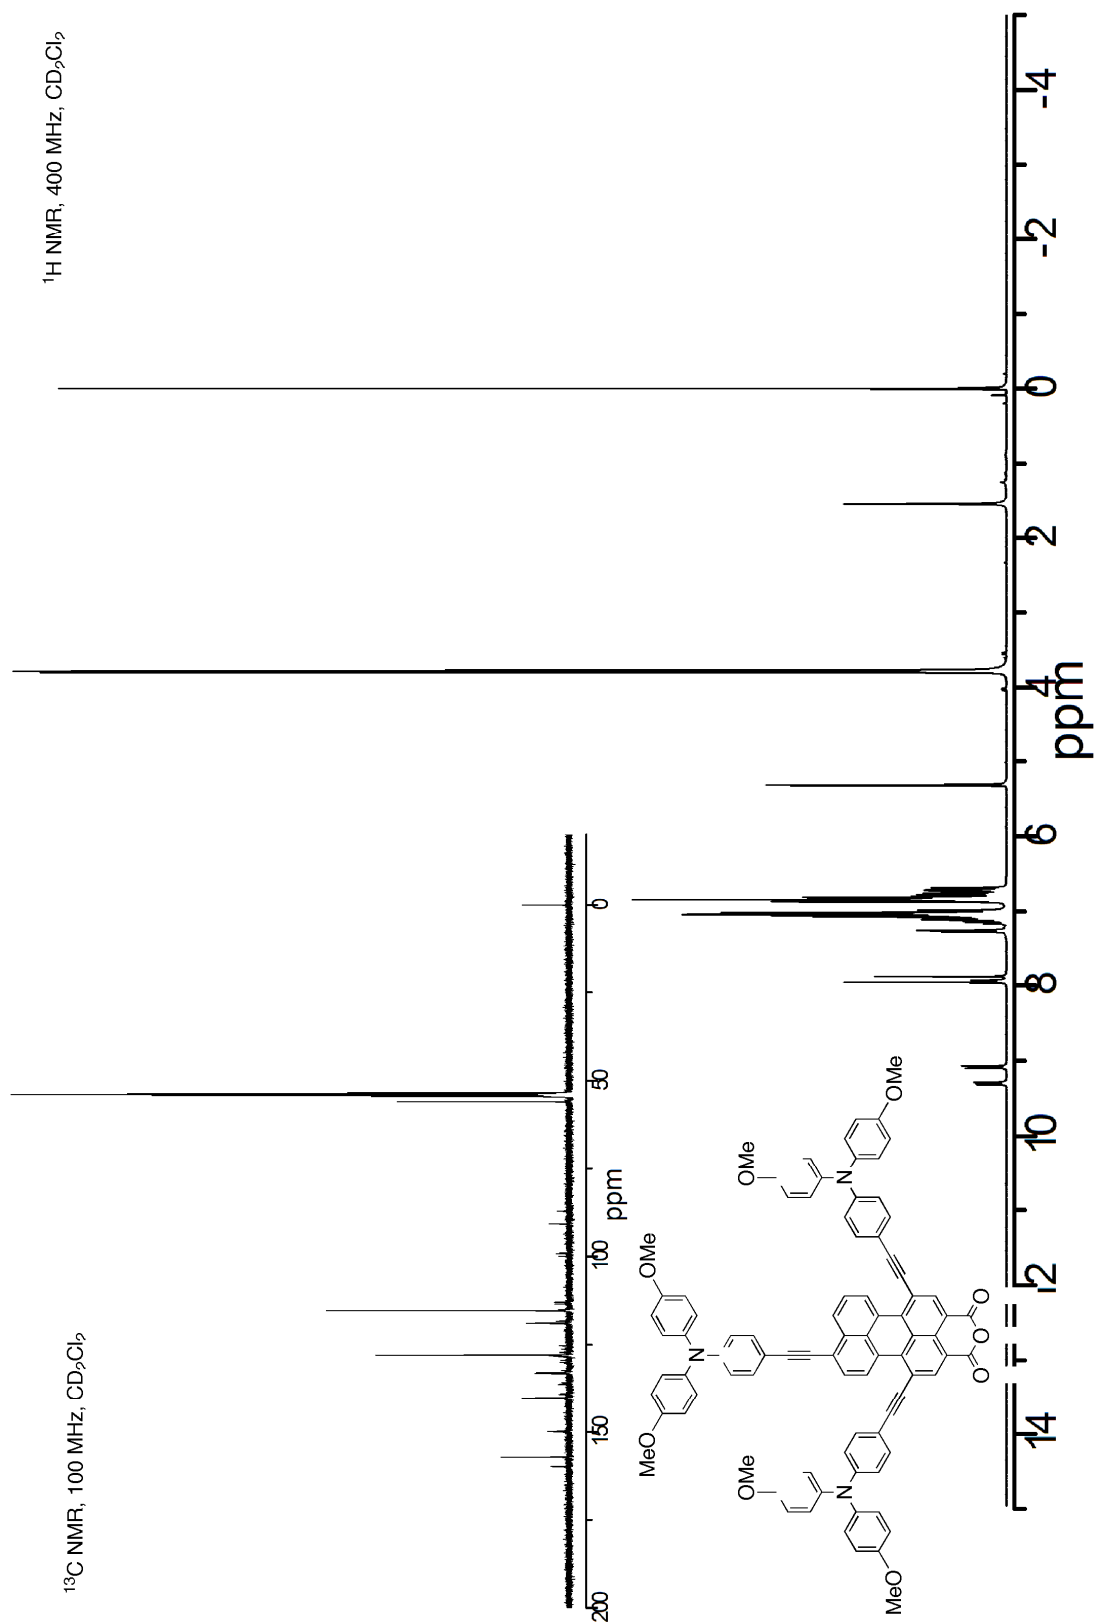

**Figure S6.H** and  $^{13}\text{C}$  NMR spectra of **OMe** in  $\text{CD}_2\text{Cl}_2$ .
